# Supplementary material
Source: PubMed Central journal article supplement (PMC5760440)
Supplement: NIHMS919445-supplement-1.pdf [file NIHMS919445-supplement-1.pdf]

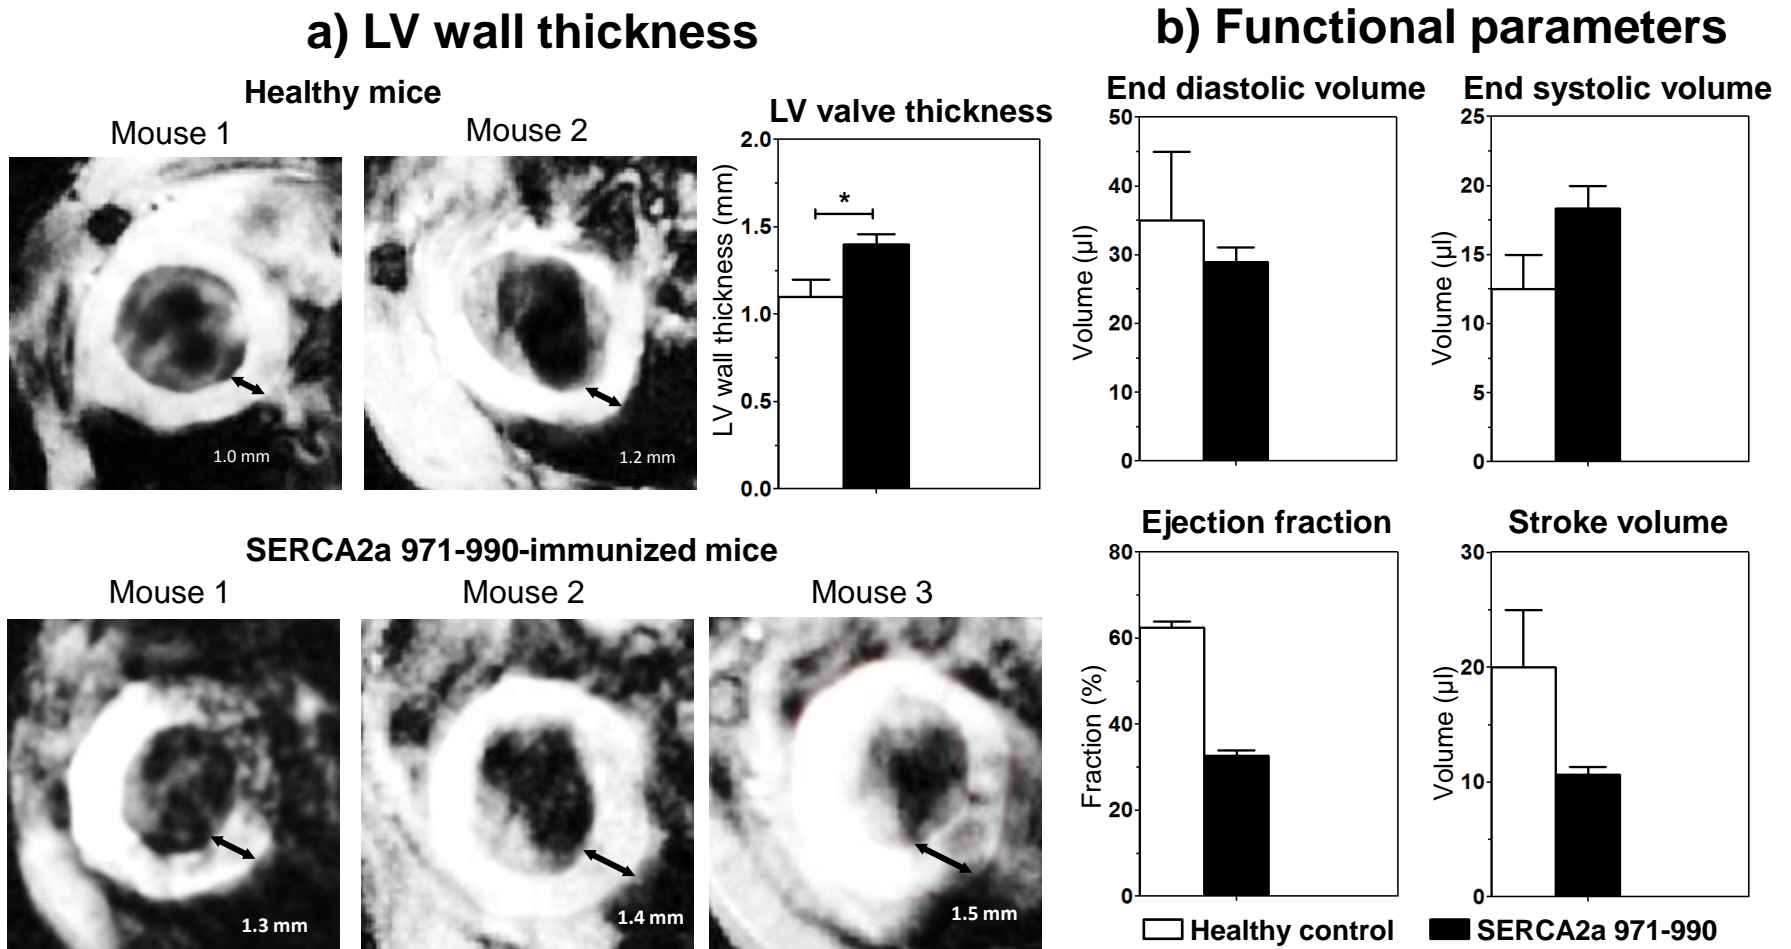

**Figure S1: Evaluation of cardiac abnormalities by MRM imaging.** A/J mice were immunized with or without SERCA2a 971-990, and on days, 38-39 post-immunization, animals were subjected to MRM imaging as described in the methods section. Comparisons were made between healthy and immunized mice with respect to structural (LV valve thickness, left panel) and functional parameters (right panel: end diastolic volume, end systolic volume, ejection fraction, and stroke volume) (n= 2 to 3 mice per group). \* $p \leq 0.05$ .

### a) SERCA2a peptides that induce T cell responses, but with mild disease

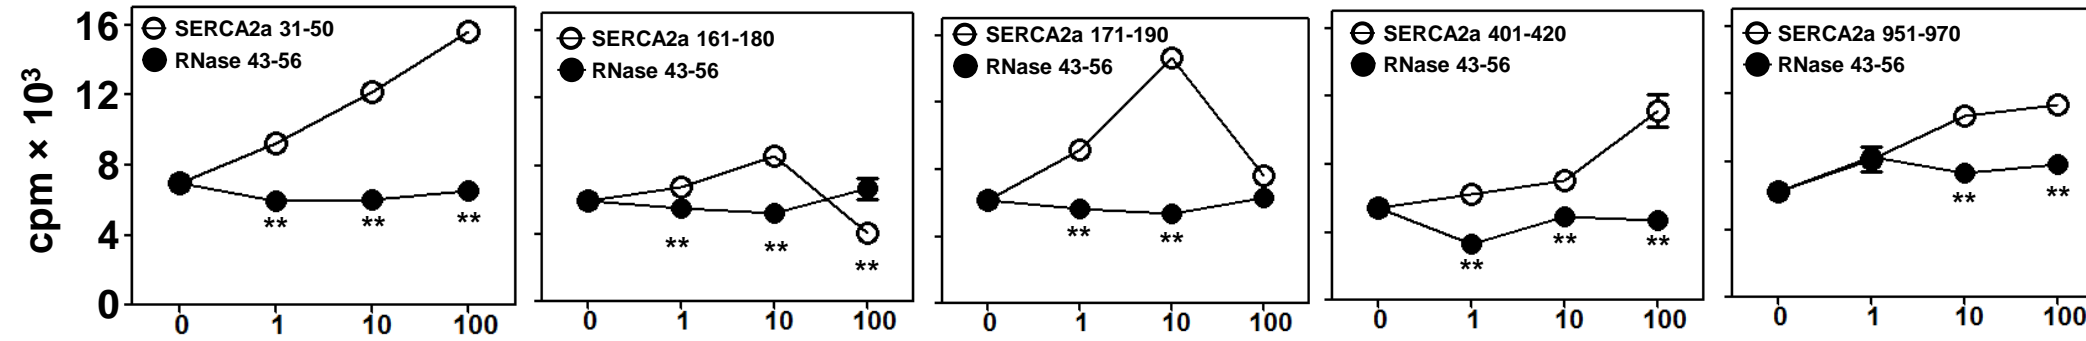

### b) SERCA2a peptides that induce T cell responses, but not disease

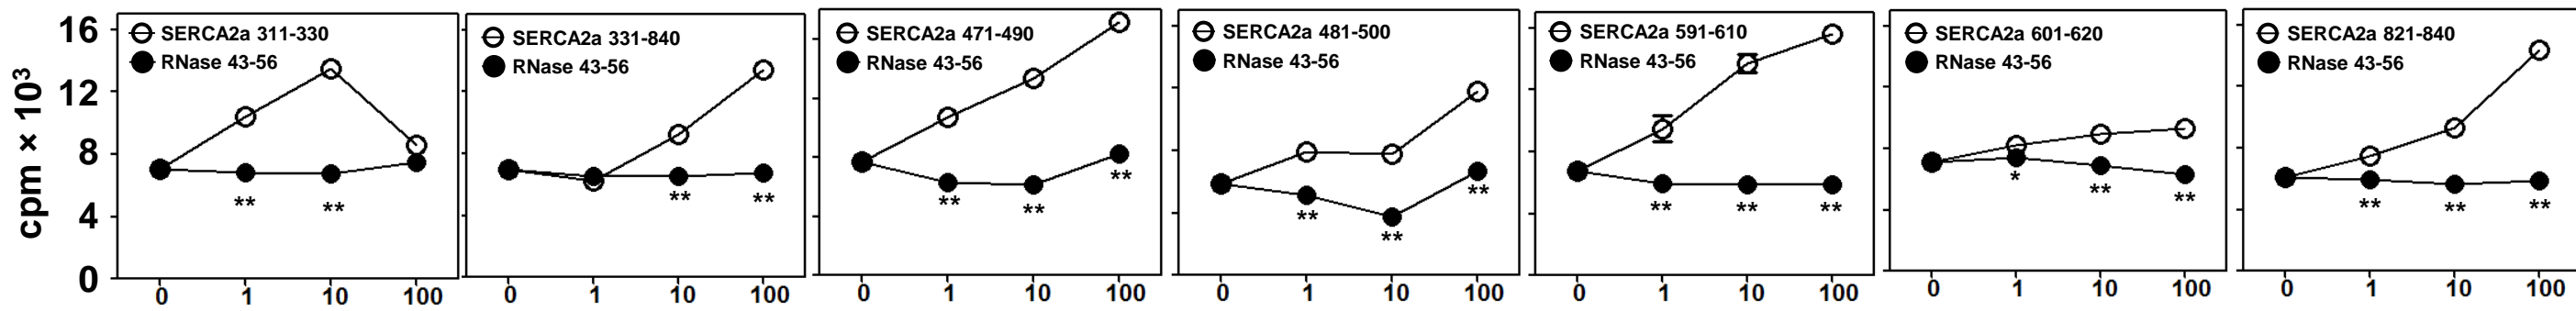

### c) Cytokines production of SERCA2a peptides that induce mild disease

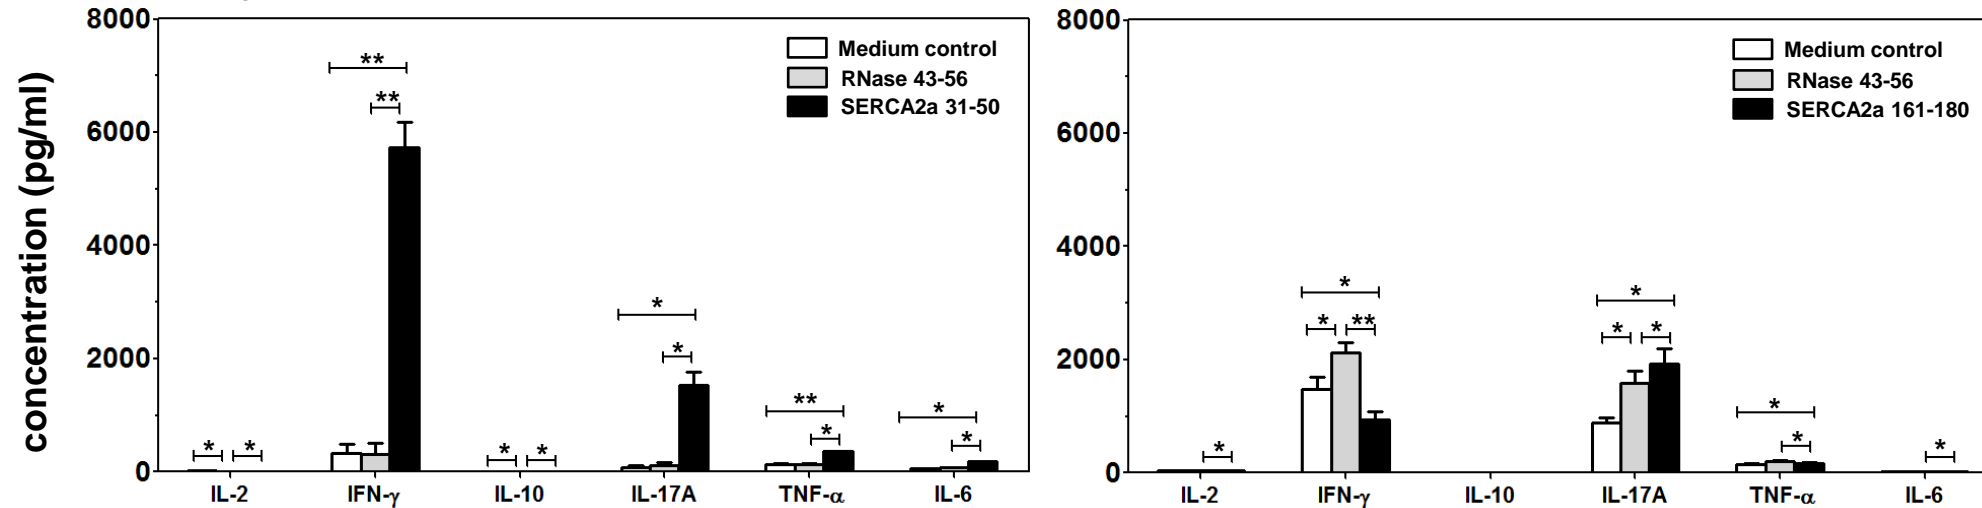

**Figure S2: SERCA2a peptides that induce differential T cell and cytokine responses, but with mild or no disease.** LNCs harvested from A/J mice immunized with the indicated peptides were stimulated with their corresponding, specific peptides or RNase 43-56 (control) for two days. After pulsing with 3[H]-thymidine for 16 hours, proliferative responses were measured as cpm. Top panel denotes peptides that induced mild disease, whereas in the middle panel, responses to peptides that induced no disease are shown. Bottom panel represents cytokine analysis in the supernatant obtained from cultures stimulated with or without SERCA2a 31-50 or SERCA2a 161-180 or control (RNase 43-56) peptide. Mean  $\pm$  SEM values representing from two to three individual experiments, each involving 2 to 3 mice are shown. \*p < 0.05, \*\*p < 0.01.

**Table S1: SERCA2a overlapping peptide library**

| Peptides          | Sequence               |
|-------------------|------------------------|
| SERCA2a 1-20      | MENAHTKTVEEVLGHFGVNE   |
| SERCA2a 11-30     | EVLGHFGVNESTGLSLEQVK   |
| SERCA2a 21-40     | STGLSLEQVKKLKERWGSNE   |
| SERCA2a 31-50     | KLKERWGSNELPAEEGKTLL   |
| SERCA2a 41-60*    | LPAEEGKTLELVIEQFEDL    |
| SERCA2a 51-70*    | ELVIEQFEDLLVRILLAAC    |
| SERCA2a 61-80*    | LVRILLAACISFVLAWFEE    |
| SERCA2a 71-90*    | ISFVLAWFEEGEETITAFVE   |
| SERCA2a 81-100*   | GEETITAFVEPFVILLILVA   |
| SERCA2a 91-110    | PFVILLILVANAIVGWQER    |
| SERCA2a 101-120** | NAIVGWQERNAENAIEALK    |
| SERCA2a 111-130   | NAENAIEALKEYEPENMGKVV  |
| SERCA2a 121-140   | EYEPENMGKVYRQDRKSVQRI  |
| SERCA2a 131-150   | RQDRKSVQRIKAKDIVPGDI   |
| SERCA2a 141-160   | KAKDIVPGDIVEIAVGDKVP   |
| SERCA2a 151-170   | VEIAVGDKVPADIRLTSIKS   |
| SERCA2a 161-180** | ADIRLTSIKSTTLRVDQSIL   |
| SERCA2a 171-190   | TTLRVDQSILTGESVSVIKH   |
| SERCA2a 181-200   | TGESVSVIKHTDPVDPRAV    |
| SERCA2a 191-210   | TDPVDPRAVNQDKKNMLFS    |
| SERCA2a 201-220   | NQDKKNMLFSGTNIAAGKAM   |
| SERCA2a 211-230** | GTNIAAGKAMGVVATGVNT    |
| SERCA2a 221-240** | GVVATGVNTEIGKIRDEM     |
| SERCA2a 231-250   | EIGKIRDEMVAEQERTPLQ    |
| SERCA2a 241-260   | ATEQERTPLQKLDEFGEQL    |
| SERCA2a 251-270   | QKLDEFGEQLSKVISLICIA   |
| SERCA2a 261-280** | SKVISLICIAVWIINIGHFN   |
| SERCA2a 271-290** | VWIINIGHFNDPVHGGSWIR   |
| SERCA2a 281-300** | DPVHGGSWIRGAIYYFKIAV   |
| SERCA2a 291-310   | GAIYYFKIAVALAVAAIPEG   |
| SERCA2a 301-320   | ALAVAAIPEGLPAVITTCLA   |
| SERCA2a 311-330   | LPAVITTCLALGTRRMAKKN   |
| SERCA2a 321-340   | LGTRRMAKKNAIVRSLPSVE   |
| SERCA2a 331-350   | AIVRSLPSVETLGCTSVICS   |
| SERCA2a 341-360*  | TLGCTSVICSDKTGTLTTNQ   |
| SERCA2a 351-370   | DKTGTLTTNQMSVCRMFIELD  |
| SERCA2a 361-380   | MSVCRMFIELDKVEGDTCSLN  |
| SERCA2a 371-390*  | KVEGDTCSLNEFSITGSTYA   |
| SERCA2a 381-400   | EFSITGSTYAPIGEVQKDDK   |
| SERCA2a 391-410   | PIGEVQKDDKPKVCHQYDGL   |
| SERCA2a 401-420   | PKVCHQYDGLVELATICALC   |
| SERCA2a 411-430   | VELATICALCNDSDALDYNEA  |
| SERCA2a 421-440   | NDSALDYNEAKGVYEKVGEA   |
| SERCA2a 431-450   | KGVEYEKVGEEATETALTCLVE |
| SERCA2a 441-460   | TETALTCLVEKMNVDTELK    |
| SERCA2a 451-470   | KMNVDTELKGLSKIERANA    |
| SERCA2a 461-480   | GLSKIERANACNSVIKQLMK   |
| SERCA2a 471-490   | CNSVIKQLMKKEFTLEFSRD   |
| SERCA2a 481-500   | KEFTLEFSRDRKSMSVYCTP   |
| SERCA2a 491-510   | RKSMSVYCTPNKPSRTSMSK   |
| SERCA2a 501-520   | NKPSRTSMSKMFVKGAPGEGV  |
| SERCA2a 511-530   | MFVKGAPGEGVIDRCTHIRVG  |
| SERCA2a 521-540   | IDRCTHIRVGSTKVPMTPGV   |
| SERCA2a 531-550   | STKVPMTPGVKQKIMSVIRE   |

|                   |                        |
|-------------------|------------------------|
| SERCA2a 541-560   | KQKIMSVIREWGS S DTLRC  |
| SERCA2a 551-570** | WGS S DTLRCLALATHDNPL  |
| SERCA2a 561-580   | LALATHDNPLKREEMHLED S  |
| SERCA2a 571-590   | KREEMHLED SANFIKYETNL  |
| SERCA2a 581-600*  | ANFIKYETNLTFVGC V GMLD |
| SERCA2a 591-610** | TFVGC V GMLDPPRIEVASSV |
| SERCA2a 601-620   | PPRIEVASSV KLCRQAGIRV  |
| SERCA2a 611-630   | KLCRQAGIRVIMITGDNKGT   |
| SERCA2a 621-640   | IMITGDNKGTAVAICRRIGI   |
| SERCA2a 631-650   | AVAICRRIGIFGQDEDVTSK   |
| SERCA2a 641-660   | FGQDEDVTSK AFTGREFDEL  |
| SERCA2a 651-670   | AFTGREFDELSPSAQRDA CL  |
| SERCA2a 661-680   | SPSAQRDA CLNARCFARVEP  |
| SERCA2a 671-690   | NARCFARVEPSHKSKIVEFL   |
| SERCA2a 681-700   | SHKSKIVEFLQSFDEITAMT   |
| SERCA2a 691-710   | QSFDEITAMTGDGVNDAPAL   |
| SERCA2a 701-720   | GDGVNDAPALKKSEIGIAMG   |
| SERCA2a 711-730*  | KKSEIGIAMGSGTAVAKTAS   |
| SERCA2a 721-740   | SGTAVAKTASEMVLADDNFS   |
| SERCA2a 731-750*  | EMVLADDNFSTIVA AVEEGR  |
| SERCA2a 741-760*  | TIVA AVEEGRAIYNNMKQFI  |
| SERCA2a 751-770   | AIYNNMKQFIRYLISSNVGE   |
| SERCA2a 761-780*  | RYLISSNVGEVVCIFLTAAL   |
| SERCA2a 771-790*  | VVCIFLTAALGFPEALIPVQ   |
| SERCA2a 781-800*  | GFPEALIPVQLLWVNLVTDG   |
| SERCA2a 791-810   | LLWVNLVTDGLPATALGFNP   |
| SERCA2a 801-820   | LPATALGFNPPDLDIMNKPP   |
| SERCA2a 811-830   | PDLDIMNKPPRNPKEPLISG   |
| SERCA2a 821-840** | RNPKEPLISGWLFFRYLAIG   |
| SERCA2a 831-850*  | WLFFRYLAIGCYVGAATVGA   |
| SERCA2a 841-860*  | CYVGAATVGA AAWWFIAADG  |
| SERCA2a 851-870** | AAWWFIAADGGPRVSFYQLS   |
| SERCA2a 861-880** | GPRVSFYQLSHFLQCKEDNP   |
| SERCA2a 871-890** | HFLQCKEDNP DFDGVDC AIF |
| SERCA2a 881-900** | DFDGVDC AIFESPYPMTMAL  |
| SERCA2a 891-910*  | ESPYPMTMALSVLVTIEMCN   |
| SERCA2a 901-920*  | SVLVTIEMCNALNSLSENQS   |
| SERCA2a 911-930   | ALNSLSENQSLLRMPPWENI   |
| SERCA2a 921-940   | LLRMPPWENIWL VGSICLSM  |
| SERCA2a 931-950*  | WL VGSICLSMSLHFLILYVE  |
| SERCA2a 941-960   | SLHFLILYVEPLPLIFQITP   |
| SERCA2a 951-970   | PLPLIFQITPLNLTQWLMVL   |
| SERCA2a 961-980   | LNLTQWLMVLKISLPVILMD   |
| SERCA2a 971-990   | KISLPVILMDETLKFVARNY   |
| SERCA2a 981-998   | ETLKFVARNYLEQPAILE     |

---

\*could not be synthesized

\*\*needed addition of DMSO to be within 0.1% in the cell culture

**Table S2: The list of pools of SERCA2a peptides used to evaluate myocarditogenicity in A/J mice**

| Pools | Peptides              | T cell responses* | Incidence (%) | Inflammatory foci <sup>†</sup> |
|-------|-----------------------|-------------------|---------------|--------------------------------|
| I     | SERCA2a 1-20          | 1.64              | 1/5 (20)      | 68.0 ± 0.00                    |
|       | SERCA2a 11-30         | 1.74              |               |                                |
|       | SERCA2a 21-40         | 1.10              |               |                                |
|       | SERCA2a 31-50         | 2.10              |               |                                |
|       | RNase 43-56 (control) | 1.17              |               |                                |
| II    | SERCA2a 91-110        | 1.72              | 0/5 (0)       | 0                              |
|       | SERCA2a 101-120       | 1.52              |               |                                |
|       | SERCA2a 111-130       | 1.31              |               |                                |
|       | SERCA2a 121-140       | 1.40              |               |                                |
|       | SERCA2a 131-150       | 1.40              |               |                                |
|       | RNase 43-56 (control) | 1.24              |               |                                |
| III   | SERCA2a 141-160       | 1.68              | 2/5 (40)      | 16.00 ± 5.00                   |
|       | SERCA2a 151-170       | 1.65              |               |                                |
|       | SERCA2a 161-180       | 2.74              |               |                                |
|       | SERCA2a 171-190       | 3.52              |               |                                |
|       | SERCA2a 181-200       | 1.32              |               |                                |
|       | RNase 43-56 (control) | 1.41              |               |                                |
| IV    | SERCA2a 191-210       | 1.25              | 0/5 (0)       | 0                              |
|       | SERCA2a 201-220       | 1.56              |               |                                |
|       | SERCA2a 211-230       | 1.56              |               |                                |
|       | SERCA2a 221-240       | 1.87              |               |                                |
|       | SERCA2a 231-250       | 1.40              |               |                                |
|       | RNase 43-56 (control) | 1.11              |               |                                |
| V     | SERCA2a 241-260       | 0.84              | 0/5 (0)       | 0                              |
|       | SERCA2a 251-270       | 1.63              |               |                                |
|       | SERCA2a 261-280       | 1.17              |               |                                |
|       | SERCA2a 271-290       | 0.98              |               |                                |
|       | SERCA2a 281-300       | 1.95              |               |                                |
|       | RNase 43-56 (control) | 1.31              |               |                                |
| VI    | SERCA2a 291-310       | 1.14              | 2/5 (40)      | 1.50 ± 0.50                    |
|       | SERCA2a 301-320       | 1.24              |               |                                |
|       | SERCA2a 311-330       | 1.54              |               |                                |
|       | SERCA2a 321-340       | 1.16              |               |                                |
|       | SERCA2a 331-350       | 1.64              |               |                                |
|       | RNase 43-56 (control) | 1.13              |               |                                |
| VII   | SERCA2a 351-370       | 1.25              | 4/5 (80)      | 1.25 ± 0.25                    |
|       | SERCA2a 361-380       | 1.04              |               |                                |
|       | SERCA2a 381-400       | 1.22              |               |                                |
|       | SERCA2a 391-410       | 1.43              |               |                                |
|       | SERCA2a 401-420       | 3.61              |               |                                |

|      |                       |      |          |             |
|------|-----------------------|------|----------|-------------|
|      | RNase 43-56 (control) | 1.49 |          |             |
| VIII | SERCA2a 411-430       | 1.06 |          |             |
|      | SERCA2a 421-440       | 0.99 |          |             |
|      | SERCA2a 431-450       | 0.91 | 0/5 (0)  | 0           |
|      | SERCA2a 441-460       | 1.50 |          |             |
|      | SERCA2a 451-470       | 1.27 |          |             |
|      | RNase 43-56 (control) | 1.63 |          |             |
| IX   | SERCA2a 461-480       | 1.24 |          |             |
|      | SERCA2a 471-490       | 2.17 |          |             |
|      | SERCA2a 481-500       | 1.71 | 4/5 (80) | 2.75 ± 1.81 |
|      | SERCA2a 491-510       | 1.14 |          |             |
|      | SERCA2a 501-520       | 1.51 |          |             |
|      | RNase 43-56 (control) | 1.08 |          |             |
| X    | SERCA2a 511-530       | 1.45 |          |             |
|      | SERCA2a 521-540       | 1.30 |          |             |
|      | SERCA2a 531-550       | 1.26 | 0/5 (0)  | 0           |
|      | SERCA2a 541-560       | 1.81 |          |             |
|      | SERCA2a 551-570       | 0.99 |          |             |
|      | RNase 43-56 (control) | 0.89 |          |             |
| XI   | SERCA2a 561-580       | 1.26 |          |             |
|      | SERCA2a 571-590       | 1.85 | 2/5 (40) | 1.0 ± 0.00  |
|      | SERCA2a 591-610       | 2.25 |          |             |
|      | SERCA2a 601-620       | 4.10 |          |             |
|      | RNase 43-56 (control) | 1.11 |          |             |
| XII  | SERCA2a 611-630       | 1.10 |          |             |
|      | SERCA2a 621-640       | 1.52 | 1/5 (20) | 7.0 ± 0.00  |
|      | SERCA2a 631-650       | 1.28 |          |             |
|      | SERCA2a 641-660       | 1.42 |          |             |
|      | RNase 43-56 (control) | 1.18 |          |             |
| XIII | SERCA2a 651-670       | 1.03 |          |             |
|      | SERCA2a 661-680       | 1.30 | 0/5 (0)  | 0           |
|      | SERCA2a 671-690       | 1.42 |          |             |
|      | SERCA2a 681-700       | 1.25 |          |             |
|      | RNase 43-56 (control) | 1.04 |          |             |
| XIV  | SERCA2a 691-710       | 1.29 |          |             |
|      | SERCA2a 701-720       | 0.90 | 0/5 (0)  | 0           |
|      | SERCA2a 721-740       | 1.57 |          |             |
|      | SERCA2a 751-770       | 1.39 |          |             |
|      | RNase 43-56 (control) | 1.35 |          |             |
| XV   | SERCA2a 791-810       | 1.53 |          |             |
|      | SERCA2a 801-820       | 0.97 | 1/5 (20) | 5.0 ± 0.00  |
|      | SERCA2a 811-830       | 1.17 |          |             |
|      | SERCA2a 821-840       | 2.17 |          |             |
|      | RNase 43-56 (control) | 1.22 |          |             |

|       |                       |      |          |             |
|-------|-----------------------|------|----------|-------------|
| XVI   | SERCA2a 851-870       | 1.73 | 0/5 (0)  | 0           |
|       | SERCA2a 861-880       | 1.30 |          |             |
|       | SERCA2a 871-890       | 1.24 |          |             |
|       | SERCA2a 881-900       | 1.27 |          |             |
|       | RNase 43-56 (control) | 1.19 |          |             |
| XVII  | SERCA2a 911-930       | 1.15 | 1/5 (20) | 2.0 ± 0.00  |
|       | SERCA2a 921-940       | 0.86 |          |             |
|       | SERCA2a 941-960       | 1.10 |          |             |
|       | SERCA2a 951-970       | 1.70 |          |             |
|       | RNase 43-56 (control) | 1.15 |          |             |
| XVIII | SERCA2a 961-980       | 1.29 | 4/5 (80) | 9.75 ± 7.13 |
|       | SERCA2a 971-990       | 2.86 |          |             |
|       | SERCA2a 981-998       | 1.69 |          |             |
|       | RNase 43-56 (control) | 1.19 |          |             |

RNase 43-56, control for T cell responses; \*fold difference in T cell responses are shown;

†represents mean ± SEM values derived from myocarditic animals
